# Supplementary material for: Transcriptome Analysis of Native Kentucky Bluegrass (Poa pratensis L.) in Response to Osmotic Stress
Source: MDPI journal article supplement (doi:10.3390/plants12233971), 2023-11-25
Supplement: s1 [file s1]

# Supplementary Information

**Table S1.** Data quality summary of samples

|       | Raw reads | Clean reads | Error (%) | Clean_bases | Q20   | Q30   |
|-------|-----------|-------------|-----------|-------------|-------|-------|
| L0_1  | 25866131  | 25041924    | 0.02      | 7.51G       | 98.4  | 95.25 |
| L0_2  | 23219099  | 22531956    | 0.02      | 6.76G       | 98.45 | 95.38 |
| L0_3  | 23442426  | 22942083    | 0.02      | 6.88G       | 98.29 | 94.86 |
| L2_1  | 23064899  | 22694089    | 0.02      | 6.81G       | 98.41 | 95.16 |
| L2_2  | 23686522  | 23222260    | 0.02      | 6.97G       | 98.35 | 95.03 |
| L2_3  | 20569478  | 20091708    | 0.02      | 6.03G       | 98.28 | 94.91 |
| L50_1 | 23223593  | 22901918    | 0.02      | 6.87G       | 98.37 | 95.01 |
| L50_2 | 22782252  | 22367453    | 0.02      | 6.71G       | 98.43 | 95.24 |
| L50_3 | 20966916  | 20613887    | 0.02      | 6.18G       | 98.29 | 94.85 |
| R0_1  | 21419350  | 20987087    | 0.02      | 6.30G       | 98.2  | 94.48 |
| R0_2  | 22339635  | 21803945    | 0.02      | 6.54G       | 98.2  | 94.62 |
| R0_3  | 21462951  | 21068240    | 0.02      | 6.32G       | 98.15 | 94.38 |
| R2_1  | 21982104  | 21569433    | 0.02      | 6.47G       | 98.06 | 94.42 |
| R2_2  | 21593969  | 20965483    | 0.02      | 6.29G       | 98.19 | 94.76 |
| R2_3  | 22621121  | 22283473    | 0.02      | 6.69G       | 98.1  | 94.4  |
| R50_1 | 22975970  | 21779479    | 0.03      | 6.53G       | 96.9  | 92.9  |
| R50_2 | 23162466  | 22295946    | 0.02      | 6.69G       | 98.07 | 94.71 |
| R50_3 | 23374197  | 22984339    | 0.02      | 6.90G       | 98.25 | 94.89 |
| Total | 407753079 | 398144703   | -         | 119.45G     | -     | -     |

Raw reads: the number of reads in the original data. Clean Reads: the number of reads filtered from the original data. Error (%): error rate of sequencing. Clean bases: base number filtered from raw data. Q20: percentage of bases with Phred values greater than 20 in total bases. Q30: percentage of bases with Phred values greater than 30 in total bases.

**Table S2.** Summary statistics for the common vetch transcriptome assemblies

| Length_interval   | Transcripts | Unigenes  |
|-------------------|-------------|-----------|
| 300bp-500bp       | 436314      | 273637    |
| 500bp-1kbp        | 377759      | 187379    |
| 1kb-2kbp          | 211158      | 82764     |
| >2kbp             | 65613       | 25490     |
| Total number      | 1090844     | 569270    |
| Min_length        | 301         | 301       |
| Mean_length       | 831         | 737       |
| Median_length     | 592         | 515       |
| Max_length        | 16653       | 16653     |
| N50               | 1049        | 870       |
| N90               | 398         | 371       |
| Total_nucleotides | 906582325   | 419561752 |

Length interval: the different length of transcriptome assemblies. Min length: the minimum length of transcriptome assemblies. Mean length: the average length of transcriptome assemblies. Median length: the median length of transcriptome assemblies. Max length: the maximum length of transcriptome assemblies. N50: the transcriptome assemblies are sorted from long to short in length and accumulated to more than 50% of total length. N90: the transcriptome assemblies are sorted from long to short in length and accumulated to more than 90% of total length.

**Table S3.** Number of functional comments

| Database                           | Number of Unigenes | Percentage (%) |
|------------------------------------|--------------------|----------------|
| Annotated in Nr                    | 271475             | 47.68          |
| Annotated in Nt                    | 116438             | 20.45          |
| Annotated in KO                    | 121782             | 21.39          |
| Annotated in SwissProt             | 204584             | 35.93          |
| Annotated in PFAM                  | 248701             | 43.68          |
| Annotated in GO                    | 248683             | 43.68          |
| Annotated in KOG                   | 103921             | 18.25          |
| Annotated in all Databases         | 23636              | 4.15           |
| Annotated in at least one Database | 365785             | 64.25          |
| Total Unigenes                     | 569270             | 100            |

Nr: NCBI non-redundant protein sequences. Nt: NCBI nucleotide sequences. KO: Kyoto Encyclopedia of Genes and Genomes. SwissProt: a manually annotated and reviewed protein sequence database. PFAM: protein family. GO: gene ontology. KOG: euKaryotic Ortholog Groups.

**Table S4.** Specific primers of quantitative real-time PCR (qRT-PCR)

| Gene ID               | Sequence              | T <sub>m</sub> | Primer name |
|-----------------------|-----------------------|----------------|-------------|
| Cluster-293458.138681 | GACATTGCCAGCTGACAACC  | 59.8           | GAPA-F      |
| Cluster-293458.138681 | GGAGGTCATGCATTGCAACG  | 60.2           | GAPA-R      |
| Cluster-293458.138507 | CCAAGAGGTATCGGTGCTGG  | 60.2           | PRK-F       |
| Cluster-293458.138507 | CTCGAGAGGTTGCTCAGGTG  | 60.1           | PRK-R       |
| Cluster-293458.138203 | CTGAACTCCAGGCAGGGAAC  | 60.3           | rbcS-F      |
| Cluster-293458.138203 | GCATGCAGGTTTGCCCAATT  | 60.3           | rbcs-R      |
| Cluster-293458.141288 | TGACAGTCAGGCCAAATGCT  | 59.9           | SUSase-F    |
| Cluster-293458.141288 | CCTGGAGTTTGCCGTGTACT  | 60             | SUSase-R    |
| Cluster-293458.132279 | GAGAGCGAGGACAGGTTTCAG | 59.8           | ABF-F       |
| Cluster-293458.132279 | TTCGACAAGGAGTTGGTGG   | 59.9           | ABF-R       |
| Cluster-293458.142366 | GAAGCAAAGCGATCCCCTCT  | 60.1           | amyB-F      |
| Cluster-293458.142366 | TTCTGTGTGATCGGCTCGAG  | 59.8           | amyB-R      |
| Cluster-293458.144677 | ACTCCTCCTTGCAAGAACGG  | 60             | HK-F        |
| Cluster-293458.144677 | TTCCGAGCGAAACAGAGCAT  | 60             | HK-R        |
| Cluster-293458.117885 | TTCGACCCGGACGTAAAAGC  | 60.7           | RAFS-F      |
| Cluster-293458.117885 | GGACAGGGTCGTCATCCAAG  | 60.1           | RAFS-R      |
| Cluster-293458.135562 | TCCTGGGGTCACTCTGTCTC  | 60.3           | INV-F       |
| Cluster-293458.135562 | TTGGCATCGAATGGGGAGTC  | 60.1           | INV-R       |
| Cluster-293458.140936 | TGTCTGTCCACTACCGCAAC  | 60             | otsB-F      |
| Cluster-293458.140936 | TCAGCTGCGTCCATAGAAGC  | 60.2           | otsB-R      |

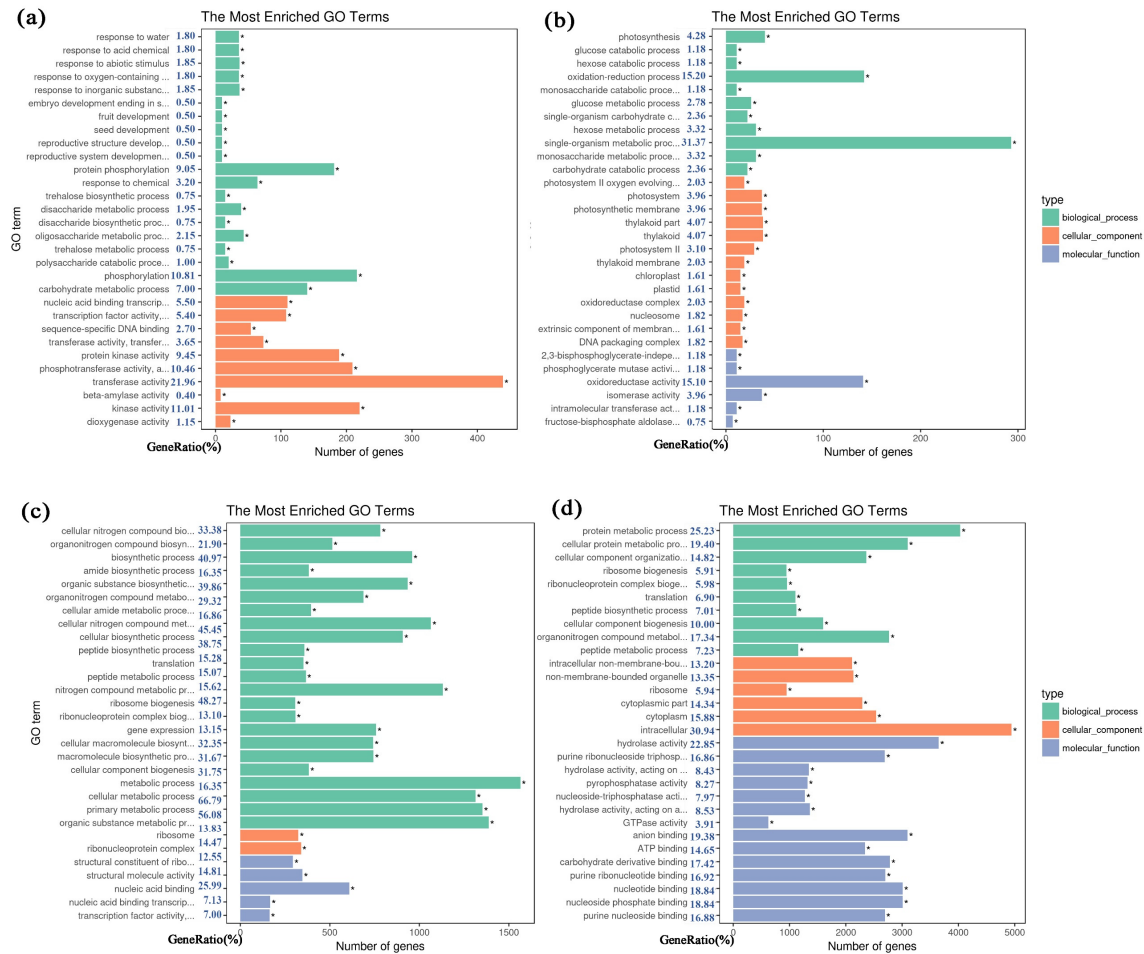

**Figure S1.** GO enrichment analysis of the up- and down-regulated DEGs in leaves and roots. **(a)** The most enriched GO terms of the up-regulated DEG in leaves; **(b)** the most enriched GO terms of the down-regulated DEGs in leaves; **(c)** the most enriched GO terms of the up-regulated DEG in roots; **(d)** the most enriched GO terms of the down-regulated DEGs in roots. Single (\* $P < 0.05$ ) and two asterisks (\*\* $P < 0.01$ ) represent significant differences in the student's t-test between the different treatments.

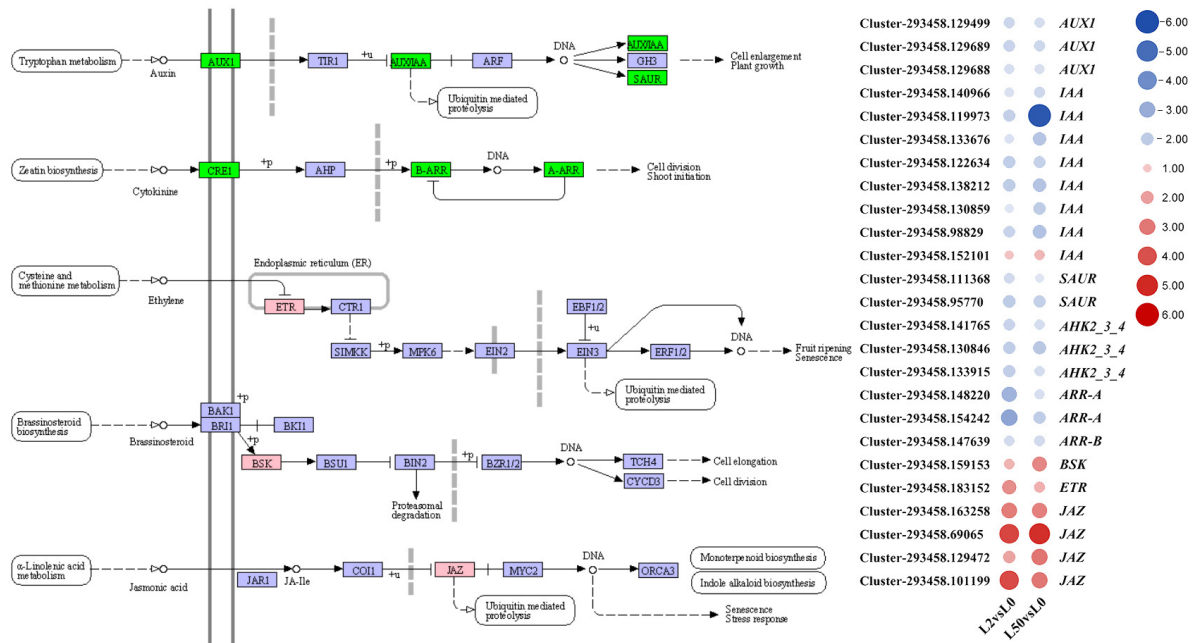

**Figure S2.** Analysis of DEGs involved in signal transduction of plant hormones (IAA, CTK, ETH, BR, JA) in leaves in response to osmotic stress. Schemes were adapted from KEGG (ko04075). Shapes and arrows follow the KEGG representation standards (<https://www.kegg.jp/kegg/>) (assessed on 11<sup>th</sup> November 2023), except for color codes. The green rectangles represent down-regulated genes, while the pink rectangles represent up-regulated genes. The color spectrum of heat map ranging from blue to red represents log<sub>2</sub>FC values from low to high.
